# Supplementary material
Source: MDPI journal article supplement (https://www.mdpi.com/2073-4395/12/5/1169)
Supplement: s1 [file s1 › agronomy-1679269-supplementary.pdf]

## Tables

**Table S1.** Socio-demographic factors of farmers and background information about participants' agricultural practices in four townships of Miaoli County.

| Variable                      | <i>n</i>         | %    | Variable             | <i>n</i>         | %    |
|-------------------------------|------------------|------|----------------------|------------------|------|
| <b>Township</b>               | 126              |      | <b>Own farm</b>      | 124 <sup>a</sup> |      |
| Sanyi                         | 30               | 23.8 | Yes                  | 90               | 72.6 |
| Zhuolan                       | 54               | 42.9 | No                   | 34               | 27.4 |
| Yuanli/ Tongxiao <sup>b</sup> | 42               | 33.3 | <b>Years farming</b> | 117 <sup>a</sup> |      |
| <b>Age</b>                    | 120 <sup>a</sup> |      | 1-10                 | 45               | 38.5 |
| 18-35                         | 16               | 13.4 | 11-20                | 21               | 17.9 |
| 35-55                         | 43               | 35.8 | 21-30                | 21               | 17.9 |
| 55+                           | 61               | 50.8 | 30+                  | 30               | 25.6 |
| <b>Gender</b>                 | 107 <sup>a</sup> |      | <b>Farm animals</b>  | 124 <sup>a</sup> |      |
| Male                          | 72               | 67.3 | Yes                  | 34               | 27.4 |
| Female                        | 35               | 32.7 | No                   | 90               | 72.6 |
| <b>Education</b>              | 123 <sup>a</sup> |      | <b>Crop type</b>     | 126              |      |
| Elementary school             | 16               | 13.0 | Rice                 | 35               | 27.8 |
| High school                   | 63               | 51.2 | Vegetables           | 24               | 19.0 |
| University/ College           | 38               | 30.9 | Fruit                | 67               | 53.2 |
| Graduate studies              | 6                | 4.9  | <b>Crop storage</b>  | 126              |      |
| <b>Main occupation</b>        | 126              |      | Yes                  | 100              | 79.4 |
| Farming                       | 95               | 75.4 | No                   | 26               | 20.6 |
| Other                         | 31               | 24.6 | <b>Use of traps</b>  | 117 <sup>a</sup> |      |
| <b>Main income</b>            | 126              |      | Yes                  | 41               | 35.0 |
| Farming                       | 95               | 75.4 | No                   | 76               | 65.0 |
| Other                         | 31               | 24.6 |                      |                  |      |

Notes: <sup>a</sup> indicates lower total *n* value due to missing data, participants left some questions blank; <sup>b</sup> townships joined due to low sample size from Tongxiao, close proximity between two townships, and similar types of crops grown.

**Table S2.** Spearman rank correlation matrix of relationships between predictor variables. Two-tailed *P* values are displayed below coefficients. Significance is indicated in bold.

|                              | Age                          | Gender                  | Education                    | Main income                 | Main occupation <sup>1</sup> | Own farm        | Years farming <sup>1</sup>  | Pets                        | Farm animals    | Crop type                    | Crop storage          | Rodent problem              | Rodent worst <sup>1</sup> |
|------------------------------|------------------------------|-------------------------|------------------------------|-----------------------------|------------------------------|-----------------|-----------------------------|-----------------------------|-----------------|------------------------------|-----------------------|-----------------------------|---------------------------|
| Age                          | 1                            |                         |                              |                             |                              |                 |                             |                             |                 |                              |                       |                             |                           |
| Gender                       | 0.230*<br><b>0.020</b>       | 1                       |                              |                             |                              |                 |                             |                             |                 |                              |                       |                             |                           |
| Education                    | -0.518**<br><b>&lt;0.001</b> | -0.174<br>0.077         | 1                            |                             |                              |                 |                             |                             |                 |                              |                       |                             |                           |
| Main income                  | -0.053<br>0.565              | 0.230*<br><b>0.017</b>  | 0.182*<br><b>0.044</b>       | 1                           |                              |                 |                             |                             |                 |                              |                       |                             |                           |
| Main occupation <sup>1</sup> | -0.058<br>0.529              | 0.319**<br><b>0.001</b> | 0.208*<br><b>0.021</b>       | 0.810**<br><b>&lt;0.001</b> | 1                            |                 |                             |                             |                 |                              |                       |                             |                           |
| Own farm                     | -0.047<br>0.614              | 0.045<br>0.651          | 0.051<br>0.577               | 0.032<br>0.724              | 0.104<br>0.249               | 1               |                             |                             |                 |                              |                       |                             |                           |
| Years farming <sup>1</sup>   | 0.525**<br><b>&lt;0.001</b>  | 0.045<br>0.661          | -0.369**<br><b>&lt;0.001</b> | -0.171<br>0.065             | -0.193*<br><b>0.037</b>      | -0.018<br>0.847 | 1                           |                             |                 |                              |                       |                             |                           |
| Pets                         | -0.121<br>0.189              | 0.127<br>0.195          | 0.114<br>0.213               | 0.014<br>0.876              | -0.005<br>0.958              | 0.140<br>0.121  | -0.050<br>0.591             | 1                           |                 |                              |                       |                             |                           |
| Farm animals                 | -0.048<br>0.607              | -0.154<br>0.116         | 0.032<br>0.730               | -0.073<br>0.418             | -0.063<br>0.490              | 0.019<br>0.832  | 0.144<br>0.124              | 0.309**<br><b>&lt;0.001</b> | 1               |                              |                       |                             |                           |
| Crop type                    | 0.136<br>0.139               | 0.183<br>0.059          | -0.213*<br><b>0.018</b>      | -0.178*<br><b>0.046</b>     | -0.189*<br><b>0.034</b>      | -0.006<br>0.946 | 0.344**<br><b>&lt;0.001</b> | 0.041<br>0.653              | -0.115<br>0.205 | 1                            |                       |                             |                           |
| Crop storage                 | -0.101<br>0.274              | -0.007<br>0.942         | 0.066<br>0.470               | -0.063<br>0.484             | -0.027<br>0.760              | -0.072<br>0.425 | 0.092<br>0.324              | 0.067<br>0.461              | 0.095<br>0.296  | -0.018<br>0.840              | 1                     |                             |                           |
| Rodent problem               | 0.058<br>0.530               | 0.004<br>0.969          | -0.089<br>0.328              | 0.034<br>0.706              | -0.019<br>0.832              | -0.067<br>0.457 | 0.042<br>0.657              | -0.010<br>0.912             | 0.129<br>0.154  | -0.272**<br><b>0.002</b>     | 0.215<br><b>0.016</b> | 1                           |                           |
| Rodent worst <sup>1</sup>    | -0.023<br>0.804              | 0.103<br>0.293          | 0.030<br>0.745               | 0.121<br>0.176              | 0.132<br>0.142               | -0.007<br>0.943 | -0.119<br>0.202             | 0.072<br>0.425              | 0.111<br>0.221  | -0.391**<br><b>&lt;0.001</b> | 0.106<br>0.237        | 0.536**<br><b>&lt;0.001</b> | 1                         |

Notes: \*  $P < 0.05$  (two-tailed), \*\*  $P < 0.01$  (two-tailed); <sup>1</sup> variable excluded from model construction for the dependent variable *rodent attitude (RA) score*

**Table S3.** Chi-square test statistics determining associations between independent variables and 'rodenticide use' of participants who perceived rodents to be problematic. Significance is indicated in bold.

| Variable       | <i>n</i> | $\chi^2$ | <i>df</i> | <i>P</i>        |
|----------------|----------|----------|-----------|-----------------|
| Age            | 66       | 6.03     | 2         | <b>&lt;0.05</b> |
| Gender         | 65       | 0.35     | 1         | 0.557           |
| Education      | 65       | 6.96     | 2         | <b>&lt;0.05</b> |
| Main income    | 70       | 0.00     | 1         | 0.999           |
| Ownership      | 68       | 0.00     | 1         | 0.987           |
| Years farming  | 64       | 4.18     | 3         | 0.236           |
| Pets           | 69       | 0.09     | 1         | 0.765           |
| Farm animals   | 68       | 0.52     | 1         | 0.471           |
| Crop type      | 70       | 5.10     | 2         | 0.078           |
| Crop storage   | 70       | 0.16     | 1         | 0.745           |
| Use of traps   | 65       | 2.44     | 1         | 0.118           |
| Rodent problem | 70       | 0.36     | 1         | 0.550           |

Notes: Analysis based on subset of sample: farmers who perceived rodents to cause damage to their crops (*n* = 70)

**Table S4.** Reasons provided by farmers for not currently using rodenticides. Freq. = frequency.

| Reason                                       | Freq. (%) |
|----------------------------------------------|-----------|
| Not necessary                                | 25 (39.7) |
| Perceive rodenticides as ineffective         | 16 (25.4) |
| Environmentally-friendly farming practices   | 10 (15.9) |
| Belief in biological control of rodent pests | 6 (9.5)   |
| Other                                        | 6 (9.5)   |
| <i>Total</i>                                 | 63        |

**Table S5.** Methods of acquisition and considerations for which products of rodenticides to use reported by farmers. Responses only from farmers who currently use rodenticides. Freq. = frequency.

| <b>Method of acquisition</b> | <b>Freq. (%)</b> | <b>Considerations for use</b> | <b>Freq. (%)</b> |
|------------------------------|------------------|-------------------------------|------------------|
| Request from government      | 32 (59.3)        | Availability                  | 20 (26.3)        |
| Buy from local store         | 21 (38.9)        | Effectiveness                 | 15 (19.7)        |
| Buy from online store        | 1 (1.8)          | Environmental friendliness    | 10 (13.2)        |
| <i>Total</i>                 | 54               | Other people's health         | 9 (11.8)         |
|                              |                  | Farmer community trends       | 9 (11.8)         |
|                              |                  | Personal health               | 5 (6.6)          |
|                              |                  | Price                         | 4 (5.3)          |
|                              |                  | Tradition                     | 3 (4.0)          |
|                              |                  | Other                         | 1 (1.3)          |
|                              |                  | <i>Total</i>                  | 76               |

## Figures

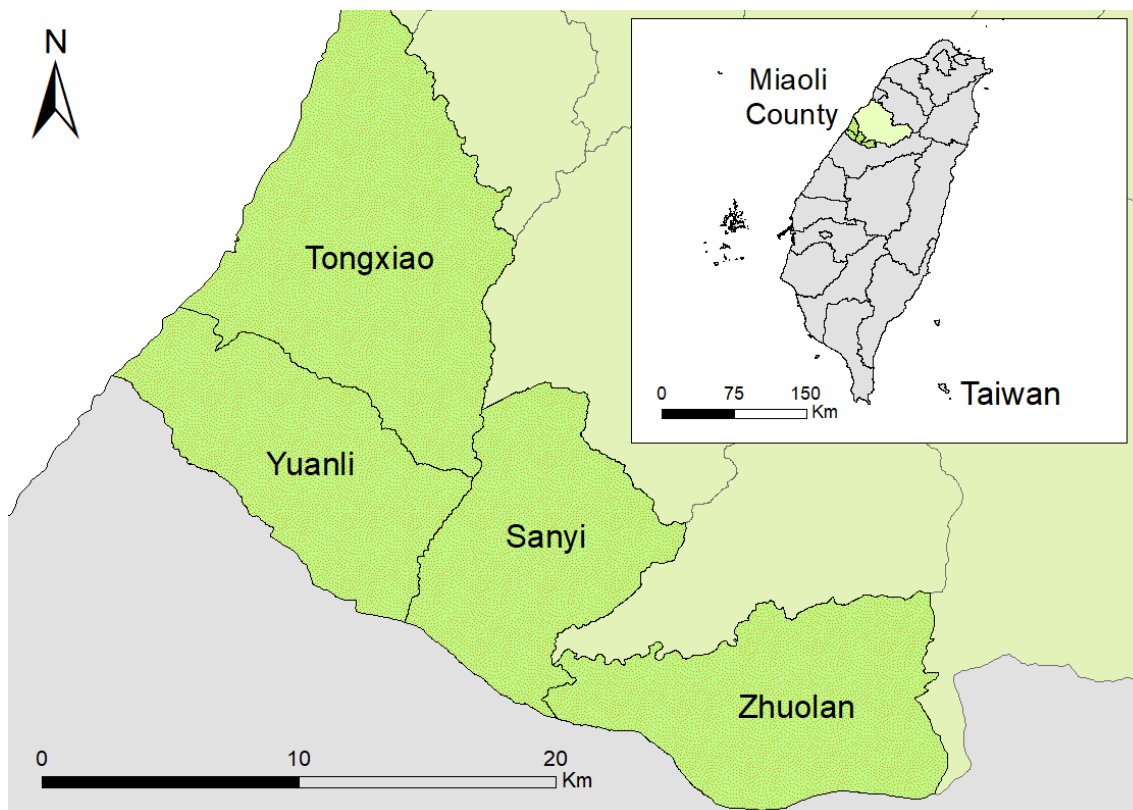

**Figure S1.** Map of townships Zhuolan, Sanyi, Yuanli, and Tongxiao in Miaoli County, Taiwan, where sampling for the survey was conducted.

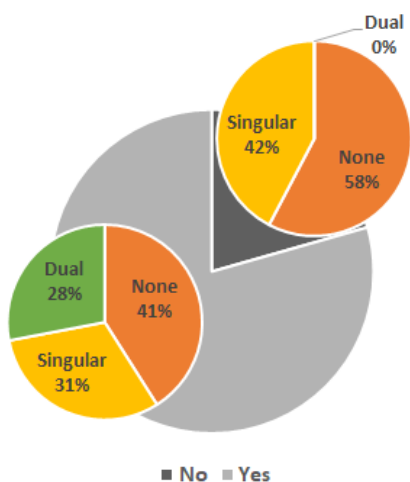

**Figure S2.** Comparison of crop storage and rodent problem. Percentages based on farmers' responses. Smaller pie charts indicate distribution (%) for the subgroup it is overlapped with.

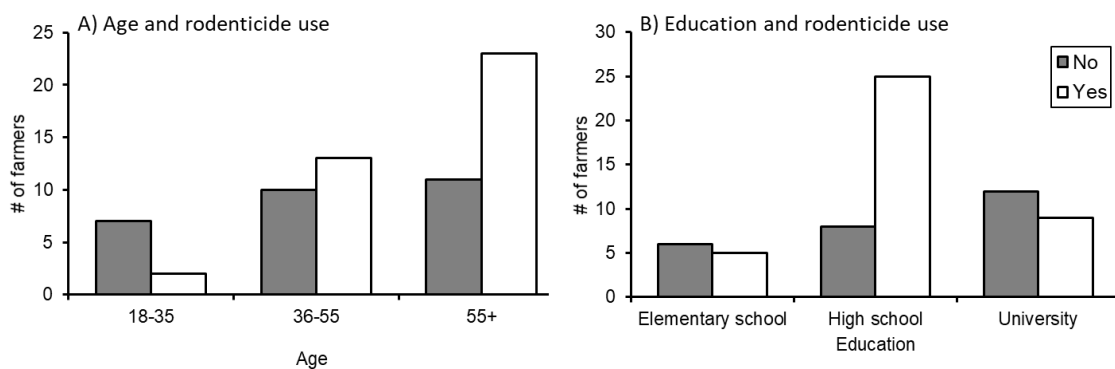

**Figure S3.** Rodenticide use of farmers compared between A) age, and B) education. Subset of sample ( $n = 70$ ): farmers who perceived rodents to cause damage to their crops. Results based on cross-tabulations and chi square tests (Table S3)
